# Supplementary material
Source: PubMed Central journal article supplement (PMC3436204)
Supplement: supp_M112.373191_jbc.M112.373191-1.pdf [file supp_M112.373191_jbc.M112.373191-1.pdf]

**Supplement Table: Detailed information for the peptides used to map toad cardiac myosin heavy chain sequences**

The Mascot database search information was exported to Excel. The accession numbers and protein names of the matched proteins are presented here in "Accession #" and "Protein description" columns respectively. In addition, the peptide sequence, start and end positions, peptide scores and enzyme used for digestion are included in the table.

| Accession # | Protein description                                                                            | Start | End  | Score | Peptide sequence            | Enzyme       |
|-------------|------------------------------------------------------------------------------------------------|-------|------|-------|-----------------------------|--------------|
| gj148222862 | myosin, heavy polypeptide 15 [Xenopus laevis]                                                  | 42    | 50   | 49    | EAYLEAEIK                   | Lys-C        |
| gj148222862 | myosin, heavy polypeptide 15 [Xenopus laevis]                                                  | 66    | 81   | 18    | TVVVKEGDIQMNPPK             | Trypsin      |
| gj301605390 | PREDICTED: myosin-6-like [Xenopus (Silurana) tropicalis]                                       | 87    | 96   | 25    | DMAMLTHLNE                  | Glu-C        |
| gj148222862 | myosin, heavy polypeptide 15 [Xenopus laevis]                                                  | 141   | 153  | 21    | KGKRRSEAPPHFH               | chymotrypsin |
| gj301605390 | PREDICTED: myosin-6-like [Xenopus (Silurana) tropicalis]                                       | 166   | 182  | 72    | NRENQSMITGESGAGK            | Trypsin      |
| gj148222862 | myosin, heavy polypeptide 15 [Xenopus laevis]                                                  | 174   | 192  | 39    | ITGESGAGKTVNTRKVIQY         | chymotrypsin |
| gj148222862 | myosin, heavy polypeptide 15 [Xenopus laevis]                                                  | 213   | 235  | 77    | TGGTLEDQIQANPALEAFGNK       | Lys-C        |
| gj148222862 | myosin, heavy polypeptide 15 [Xenopus laevis]                                                  | 248   | 258  | 30    | FIRIHFGTGK                  | Lys-C        |
| gj148222862 | myosin, heavy polypeptide 15 [Xenopus laevis]                                                  | 254   | 267  | 62    | GTTGKLSSADIEIY              | chymotrypsin |
| gj301605390 | PREDICTED: myosin-6-like [Xenopus (Silurana) tropicalis]                                       | 259   | 271  | 67    | LSSADIEIYLLEK               | Trypsin      |
| gj148222862 | myosin, heavy polypeptide 15 [Xenopus laevis]                                                  | 269   | 276  | 30    | LEKSRVIF                    | chymotrypsin |
| gj148222862 | myosin, heavy polypeptide 15 [Xenopus laevis]                                                  | 272   | 294  | 33    | SRVIFQQPGRSRYHIFQITSGK      | Lys-C        |
| gj148222862 | myosin, heavy polypeptide 15 [Xenopus laevis]                                                  | 348   | 364  | 28    | YGAYKLTGAIMHFGNMK           | Lys-C        |
| gj165973976 | myosin, heavy chain 3, skeletal muscle, embryonic [Gallus gallus]                              | 405   | 414  | 31    | VKVGNEYVTK                  | Trypsin      |
| gj148222862 | myosin, heavy polypeptide 15 [Xenopus laevis]                                                  | 424   | 433  | 26    | AVGALAKGIY                  | chymotrypsin |
| gj301605390 | PREDICTED: myosin-6-like [Xenopus (Silurana) tropicalis]                                       | 447   | 454  | 28    | TLDTKLPR                    | Trypsin      |
| gj148222862 | myosin, heavy polypeptide 15 [Xenopus laevis]                                                  | 486   | 504  | 33    | LQQFFNHMHMFVLEQEEYKK        | Trypsin      |
| gj45383005  | myosin-7B [Gallus gallus]                                                                      | 558   | 567  | 39    | DNHLGKSPNF                  | chymotrypsin |
| gj148222862 | myosin, heavy polypeptide 15 [Xenopus laevis]                                                  | 672   | 689  | 36    | VRCHIPNETKTPGAMDPF          | chymotrypsin |
| gj148222862 | myosin, heavy polypeptide 15 [Xenopus laevis]                                                  | 682   | 696  | 88    | TPGAMDPFLVLHQLR             | Trypsin      |
| gj148222862 | myosin, heavy polypeptide 15 [Xenopus laevis]                                                  | 693   | 701  | 19    | HQLRCNGVL                   | chymotrypsin |
| gj45383005  | myosin-7B [Gallus gallus]                                                                      | 703   | 711  | 47    | CNGVLEGR                    | Trypsin      |
| gj45383668  | myosin-3 [Gallus gallus]                                                                       | 721   | 727  | 42    | VLYADFK                     | Trypsin      |
| gj148222862 | myosin, heavy polypeptide 15 [Xenopus laevis]                                                  | 786   | 797  | 21    | ILTIQARARGK                 | Lys-C        |
| gj83405899  | myosin, heavy polypeptide 6, cardiac muscle, alpha [Mus musculus]                              | 810   | 821  | 35    | RDALLVIQWNIR                | Trypsin      |
| gj148222862 | myosin, heavy polypeptide 15 [Xenopus laevis]                                                  | 824   | 831  | 20    | MTVKNWPW                    | chymotrypsin |
| gj301605390 | PREDICTED: myosin-6-like [Xenopus (Silurana) tropicalis]                                       | 844   | 860  | 47    | SAETEKEMANMKEEFLK           | Trypsin      |
| gj148222862 | myosin, heavy polypeptide 15 [Xenopus laevis]                                                  | 879   | 886  | 43    | QVTLVQEK                    | Lys-C        |
| gj301605390 | PREDICTED: myosin-6-like [Xenopus (Silurana) tropicalis]                                       | 906   | 918  | 44    | RCDLLIKSKIQME               | Glu-C        |
| gj45382109  | myosin heavy chain, cardiac muscle isoform [Gallus gallus]                                     | 922   | 940  | 44    | ELTERVEDEEEMNSELTSK         | Lys-C        |
| gj301605390 | PREDICTED: myosin-6-like [Xenopus (Silurana) tropicalis]                                       | 928   | 941  | 95    | IEDEEEMNSELTSK              | Trypsin      |
| gj218546789 | white muscle myosin heavy chain [Sander vitreus]                                               | 936   | 947  | 58    | RKLEDECSELKK                | Lys-C        |
| gj148222862 | myosin, heavy polypeptide 15 [Xenopus laevis]                                                  | 955   | 965  | 43    | DIDDLEITLAK                 | Lys-C        |
| gj73992259  | PREDICTED: similar to myosin, heavy polypeptide 7B, cardiac muscle, beta [Canis familiaris]    | 894   | 907  | 29    | DIDDLELTLAKAEK              | Lys-C        |
| gj301605390 | PREDICTED: myosin-6-like [Xenopus (Silurana) tropicalis]                                       | 979   | 993  | 28    | NLTEEMASLDDTINK             | Trypsin      |
| gj13431711  | RecName: Full=Myosin heavy chain, fast skeletal muscle                                         | 998   | 1017 | 55    | KALQEAHQQLDLDLQAEEDK        | Lys-C        |
| gj118099526 | PREDICTED: similar to skeletal muscle myosin heavy chain MyHC-EO/IIIL [Gallus gallus]          | 1001  | 1026 | 48    | KALQEAHQQLDLDLQAEEDKVVSTLTK | Lys-C        |
| gj42556335  | myosin heavy chain [Gasterosteus aculeatus]                                                    | 321   | 338  | 74    | TKLEQQVDDLEGSLEQEK          | Lys-C        |
| gj148222862 | myosin, heavy polypeptide 15 [Xenopus laevis]                                                  | 1063  | 1075 | 39    | LTQESLMDAENDK               | Lys-C        |
| gj38347761  | myosin heavy chain [Lethenteron camtschaticum]                                                 | 1081  | 1091 | 42    | KDFEISQLSK                  | Trypsin      |
| gj148222862 | myosin, heavy polypeptide 15 [Xenopus laevis]                                                  | 1096  | 1108 | 49    | IEDEQAIVLQLQK               | Trypsin      |
| gj148222862 | myosin, heavy polypeptide 15 [Xenopus laevis]                                                  | 1112  | 1133 | 44    | ELQARIEEEEELEAERARAK        | Lys-C        |
| gj148222862 | myosin, heavy polypeptide 15 [Xenopus laevis]                                                  | 1177  | 1185 | 27    | RRDLEEATL                   | chymotrypsin |
| gj348544145 | PREDICTED: myosin-6-like [Oreochromis niloticus]                                               | 1179  | 1196 | 75    | RDLEEATLHHEATAATLR          | Trypsin      |
| gj8272640   | myosin heavy chain isoform [Rana catesbeiana]                                                  | 1196  | 1212 | 47    | RKKHADTVSELGEQIDNL          | chymotrypsin |
| gj8272640   | myosin heavy chain isoform [Rana catesbeiana]                                                  | 1198  | 1216 | 93    | HADTVSELGEQIDNLQRVK         | Trypsin      |
| gj8272640   | myosin heavy chain isoform [Rana catesbeiana]                                                  | 1211  | 1222 | 16    | NLQRVQKLEKE                 | Glu-C        |
| gj224077915 | PREDICTED: similar to myosin, heavy polypeptide 7B, cardiac muscle, beta [Taeniopygia guttata] | 1249  | 1262 | 35    | LCRTYEDQLNEAK               | Lys-C        |
| gj148222862 | myosin, heavy polypeptide 15 [Xenopus laevis]                                                  | 1292  | 1305 | 96    | LLEEKESLISQLSR              | Trypsin      |
| gj148222862 | myosin, heavy polypeptide 15 [Xenopus laevis]                                                  | 1340  | 1356 | 43    | HDCDLLREQFDDEEQEAK          | Trypsin      |
| gj148222862 | myosin, heavy polypeptide 15 [Xenopus laevis]                                                  | 1346  | 1359 | 45    | REQFDDEEQEAKAEL             | chymotrypsin |
| gj148222862 | myosin, heavy polypeptide 15 [Xenopus laevis]                                                  | 1347  | 1361 | 49    | EQFDDEEQEAKAELQR            | Trypsin      |
| gj251823950 | myosin-13 [Oryctolagus cuniculus]                                                              | 1379  | 1396 | 34    | YETDAIQRTEELLEEAKK          | Lys-C        |
| gj148222862 | myosin, heavy polypeptide 15 [Xenopus laevis]                                                  | 1378  | 1395 | 24    | ETDAIQRTEELLEEAKKLL         | chymotrypsin |
| gj148229072 | myosin, heavy chain 6, cardiac muscle, alpha [Xenopus laevis]                                  | 1399  | 1412 | 64    | LQEAEEAVEAVNAK              | Trypsin      |
| gj344290500 | PREDICTED: myosin-4-like [Loxodonta africana]                                                  | 1450  | 1459 | 69    | NFDKILSDWK                  | Trypsin      |
| gj8272640   | myosin heavy chain isoform [Rana catesbeiana]                                                  | 1460  | 1474 | 53    | QKYEEAQAELEASQK             | Lys-C        |
| gj116062137 | fast skeletal myosin heavy chain isoform mMYH-6 [Oryzias latipes]                              | 1475  | 1485 | 28    | EARSLSTELFK                 | Lys-C        |
| gj301605390 | PREDICTED: myosin-6-like [Xenopus (Silurana) tropicalis]                                       | 1488  | 1501 | 72    | NAYEEVLNLETVK               | Trypsin      |
| gj148222862 | myosin, heavy polypeptide 15 [Xenopus laevis]                                                  | 1488  | 1505 | 22    | NAYEEVLLETVKRENK            | Lys-C        |
| gj301605390 | PREDICTED: myosin-6-like [Xenopus (Silurana) tropicalis]                                       | 1534  | 1559 | 44    | QVEQEKSEVQVALEEAEGALEHEESK  | Trypsin      |
| gj45382109  | myosin heavy chain, cardiac muscle isoform [Gallus gallus]                                     | 1560  | 1571 | 39    | TLRFQLELSQLK                | Trypsin      |
| gj294489339 | ventricular myosin heavy chain [Oryzias latipes]                                               | 1572  | 1581 | 31    | AEMERKLESEK                 | Lys-C        |
| gj301605390 | PREDICTED: myosin-6-like [Xenopus (Silurana) tropicalis]                                       | 1578  | 1589 | 47    | LSEKDEETENIR                | Trypsin      |
| gj148222862 | myosin, heavy polypeptide 15 [Xenopus laevis]                                                  | 1593  | 1599 | 49    | QRIIESL                     | chymotrypsin |
| gj301605390 | PREDICTED: myosin-6-like [Xenopus (Silurana) tropicalis]                                       | 1595  | 1608 | 76    | IIESLQSNLESEAK              | Trypsin      |
| gj8272640   | myosin heavy chain isoform [Rana catesbeiana]                                                  | 1618  | 1643 | 64    | KKMEGDLNEMIEQLSHATRQATEATK  | Lys-C        |
| gj8272640   | myosin heavy chain isoform [Rana catesbeiana]                                                  | 1690  | 1698 | 31    | LRAGLDQTE                   | Glu-C        |
| gj45383005  | myosin-7B [Gallus gallus]                                                                      | 1702  | 1714 | 65    | KLAEQELLEATER               | Trypsin      |
| gj148222862 | myosin, heavy polypeptide 15 [Xenopus laevis]                                                  | 1715  | 1729 | 74    | VNLLHSQNTSLINQK             | Trypsin      |
| gj45382109  | myosin heavy chain, cardiac muscle isoform [Gallus gallus]                                     | 1760  | 1772 | 57    | AITDAAMMAEELK               | Trypsin      |
| gj45382109  | myosin heavy chain, cardiac muscle isoform [Gallus gallus]                                     | 1758  | 1773 | 71    | KAITDAAMMAEELKK             | Trypsin      |
| gj148222862 | myosin, heavy polypeptide 15 [Xenopus laevis]                                                  | 1787  | 1797 | 39    | NMEQTIKDLQK                 | Lys-C        |
| gj45382109  | myosin heavy chain, cardiac muscle isoform [Gallus gallus]                                     | 1798  | 1808 | 66    | RLDEAEQIALK                 | Lys-C        |
| gj8272640   | myosin heavy chain isoform [Rana catesbeiana]                                                  | 1804  | 1818 | 34    | QIALKGGKQKQKLE              | Glu-C        |
| gj301605390 | PREDICTED: myosin-6-like [Xenopus (Silurana) tropicalis]                                       | 1823  | 1833 | 29    | ELENELESEQR                 | Trypsin      |
| gj8272640   | myosin heavy chain isoform [Rana catesbeiana]                                                  | 1851  | 1860 | 44    | ELTYQAEEDK                  | Trypsin      |
| gj56788693  | cardiac myosin heavy chain ventricular isoform [Python molurus]                                | 1862  | 1876 | 37    | NLTRMQELIDKLQK              | Trypsin      |
| gj8272640   | myosin heavy chain isoform [Rana catesbeiana]                                                  | 1900  | 1921 | 43    | KMQHELDDAQAERADIAESQVNK     | Lys-C        |
