# Supplementary material
Source: PubMed Central journal article supplement (PMC3436204)
Supplement: supp_M112.373191_supplemental_figure.pdf [file supp_M112.373191_supplemental_figure.pdf]

|       |     |                                                                       |      |
|-------|-----|-----------------------------------------------------------------------|------|
| Query | 42  | EAYLEAEIKXXXXXXXXXXXXXXXXXXTVVVKEGDIQQMNPPKXXXXXDMAMLTHLNEXXXXX       | 101  |
|       |     | EAYLEAEIK TVVVKEGDIQQMNPPK DMAMLTHLNE                                 |      |
| Sbjct | 42  | EAYLEAEIKENGGGKVTVEVADGKTVVVKEGDIQQMNPPKFDMIEDMAMLTHLNEASVLS          | 101  |
| Query | 102 | XXXXXXXXXXXXXXXXXXXXXXXXXXXXXXXXXXXXXXXXXXXXXXXXXGKRRSEAPPHIFXXXXXXXX | 161  |
|       |     | GKRRSEAPPHIF                                                          |      |
| Sbjct | 102 | NLRKRYANWMIYTYSGLFCVTVNPKSLPVYKTEVVVTAYKGGRRSEAPPHIFSIADNAYH          | 161  |
| Query | 162 | XXXXNRENQSMLITGESGAGKTVNTRKVIQYXXXXXXXXXXXXXXXXXXXXXXXXXGGTLEDQI      | 221  |
|       |     | NRENQSMLITGESGAGKTVNTRKVIQY TGGTLEDQI                                 |      |
| Sbjct | 162 | DMLRNRENQSMLITGESGAGKTVNTRKVIQYFATVAAIGDPMGKKNQPATKTGGTLEDQI          | 221  |
| Query | 222 | IQANPALEAFGNAKXXXXXXXXXXXXFIRIHFGTGKLSADIEIYLLEKSRVIFQQPGE            | 281  |
|       |     | IQANPALEAFGNAK FIRIHFGTGKLSADIEIYLLEKSRVIFQQPGE                       |      |
| Sbjct | 222 | IQANPALEAFGNAKTLRNDNSSRFKGFIRIHFGTGKLSADIEIYLLEKSRVIFQQPGE            | 281  |
| Query | 282 | RSYHIFYQITSGKXXXXXXXXXXXXXXXXXXXXXXXXXXXXXXXXXXXXXXXXXXXXXXXXXXXX     | 341  |
|       |     | RSYHIFYQITSGK                                                         |      |
| Sbjct | 282 | RSYHIFYQITSGKMSSELQDMLLVSTNPNYDFHFSSQGVVTVDNLDDCEELMATDQAFDILG        | 341  |
| Query | 342 | XXXXXXYGAYKLTGAIMHFGNMKXXXXXXXXXXXXXXXXXXXXXXXXXXXXXXXXXXXXXXXXXXXX   | 401  |
|       |     | YGAYKLTGAIMHFGNMK                                                     |      |
| Sbjct | 342 | FISDEKYGAYKLTGAIMHFGNMKFKQKQREEQAETDGTENTDKAAYLMGISSDLVKGLM           | 401  |
| Query | 402 | XXXVKVGNEYVTKXXXXXXXXXXAVGALAKGIYXXXXXXXXXXXXXXXXXLDTKLPRXXXXXX       | 461  |
|       |     | VKVGNEYVTK AVGALAKGIY LDTKL R                                         |      |
| Sbjct | 402 | HPRVKVGNEYVTKGQTVAQVVYAVGALAKGIYDRMFKWLVVRINKTLDTKLSRQFFIGVL          | 461  |
| Query | 462 | XXXXXXXXXXXXXXXXXXXXXXXXXXLQQFFNHMHFVLEQEEYKXXXXXXXXXXXXXXXXXXXX      | 521  |
|       |     | LQQFFNHMHFVLEQEEYK                                                    |      |
| Sbjct | 462 | DIAGFEIFDLNSFEQLCINFTNEKLLQQFFNHMHFVLEQEEYKKEGIDWEFIDFGLDLQAC         | 521  |
| Query | 522 | XXXXXXXXXXXXXXXXXXXXXXXXXXXXXXXXXXXXXXXXXDNHLGKSPNFQ 565              |      |
|       |     | DNHLGKSPN Q                                                           |      |
| Sbjct | 522 | IDLIEKPLGIMSILEEEMFPAKATDMTFKSKLYDNHLGKSPNLQ 565                      |      |
| Query | 672 | VRCIIPNETKTPGAMPFLVLHQLRCNGVLEGIRXXXXXXXXXXVLYADFK 721                |      |
|       |     | VRCIIPNETKTPGAMPFLVLHQLRCNGVLEGIR VLYADFK                             |      |
| Sbjct | 672 | VRCIIPNETKTPGAMPFLVLHQLRCNGVLEGIRICRKGFPNRVLYADFK 721                 |      |
| Query | 786 | ILTLIQARARGKXXXXXXXXXXXXRDALLVIQWNIRXXMTVKNWPWXXXXXXXXXXXXXSA         | 845  |
|       |     | ILTLIQARARGK RDALLVIQWNIR MTVKNWPW SA                                 |      |
| Sbjct | 786 | ILTLIQARARGKLMRIEFQKILERRDALLVIQWNIRGFMTVKNWPWMMKLFKIKPLKSA           | 845  |
| Query | 846 | ETEKEMANMKEEFLKXXXXXXXXXXXXXXXXXQVTLVQEKXXXXXXXXXXXXXXXXXXXX          | 905  |
|       |     | ETEKEMANMK+EF K QVTLVQEK                                              |      |
| Sbjct | 846 | ETEKEMANMKDEFQKLKEALEKSEARRKELEEKQVTLVQEKNDLTLQLQAEQDMFADAE           | 905  |
| Query | 906 | RCDLLIKSKIQMEXXXELTERIEDEEEMNSELTSKKRKLEDECSELKKDIDDLEITLAK           | 965  |
|       |     | RCDLLIK+KIQME +LTERIEDEEEMNSELT+KKRKLEDECSELKKDIDDLEITLAK             |      |
| Sbjct | 906 | RCDLLIKNKIQMESKVKDLTERIEDEEEMNSELTAKKRKLEDECSELKKDIDDLEITLAK          | 965  |
| Query | 966 | AEKXXXXXXXXXXNLTEEMASLDDTINKXXXXXKALQEAHQQTLLDLQAEEDKVSTLTKX          | 1025 |
|       |     | AEK NLTEEMASLDDTINK KALQEAHQQTLLDLQAEEDKV++LTK                        |      |
| Sbjct | 966 | AEKEKHATENKVKNLTEEMASLDDTINKLTKKALQEAHQQTLLDLQAEEDKVNSLTKM            | 1025 |



```

Query  1866  MQDLIDKLQLKXXXXXXXXXXXXXXXXXXXXXXXXXXXXXKMQHELDDAQERADIAESQVNK  1921
        MQDLIDKLQLK                                                    K+QHELDDAQERADIAESQVNK
Sbjct  1866  MQDLIDKLQLKVKSYKHKQAEAESEQANQYLSKYKKLQHELDDAQERADIAESQVNK  1921

```

**Supplemental figure 1: BLAST alignment between the partial sequence of toad MHC and *Xenopus cardiac* MHC.** Blast analysis was performed using the partial sequence of toad MHC derived from LC-MS/MS analyses as query against the non-redundant protein sequences (nr) database. The default settings were used in search parameters. The alignment is shown between the query and the top hit: myosin, heavy polypeptide 15 [*Xenopus laevis*] NP\_001085151.1 and GI: 148222862. Because of the long strings of unidentified amino acids, marked as “x”, present in the middle of the query sequence, the alignment was displayed in three segments in Blast result: from amino acid 42-565, 672-721 and 786-1921.
